# Supplementary material for: The Effectiveness of Virtual-Real Fusion Teaching Models in Clinical Skills Training: A Randomized -Controlled Trial Comparing Touch Surgery and Traditional Teaching Aids for Thoracentesis
Source: Research Square preprint supplement (doi:10.21203/rs.3.rs-7528278/v1), 2025-09-25
Supplement: Supplementary file 1 [file 3bb9581db99783bb1fa4bdb7.docx]

### Highlights

1. Innovative VR-Physical Fusion Model: First RCT comparing Touch Surgery-based virtual-real integration versus traditional teaching for thoracentesis skills training.

2. Multidimensional Evaluation Framework: Implemented comprehensive assessment (knowledge, skills, guidelines, 360° feedback, satisfaction).

3. Superior Skill Acquisition: Experimental group showed significantly greater gains in theoretical knowledge (+20.3%), procedural compliance (+40.3%), and technical performance (+19.1%) vs. controls (p<0.001).

4. Enhanced Training Satisfaction: SEEQ scores 14% higher in VR-integrated group ( p <0.001), reflecting improved engagement and perceived educational quality.

5. Validated AR Education Pathway: Touch Surgery’s 3D visualization/feedback system accelerates cognitive-skill transformation in residency training.

6. Scalable Digital Solution: Overcomes spatiotemporal constraints of traditional models while maintaining ethical training standards.
